# Supplementary material for: Coimagining the Future of Voice Assistants with Cultural Sensitivity
Source: Hindawi journal article supplement (doi:10.1155/2024/3238737), 2024-03-25
Supplement: f1 [file 3238737.f1.docx]

Supplementary Material

[Elicitation Instrument: English 2](#_Toc102288477)

[Part 1: Imagine Ideal Dialogues 2](#_Toc102288478)

[Part 2: Imagine Ideal Activities 3](#_Toc102288479)

[Elicitation Instrument: Japanese・日本語 4](#_Toc102288480)

[第一部：理想的な会話内容の想像 4](#_Toc102288481)

[第二部：理想的な活動の想像 5](#_Toc102288482)

# Elicitation Instrument: English

## Part 1: Imagine Ideal Dialogues

You will be presented with two situations. For each situation, please write a script between yourself and an [ideal voice assistant/elder you trust] that represents an ideal experience and outcome.

Here's an example:
**Situation: You just saw a great movie today that you'd like to discuss.**

**You: I just got back from watching "The Terminator." Elder: Wow, what did you think?
You: It was great! I loved the special effects.
[Elder/VA]: What kind of special effects?
You: Well, they used 3D models merged with film of real actors. It was almost seamless. Elder: I'd love to see it ... I remember when 3D was new, and you could really tell it was fake. You: Things have come a long way. I also liked the message of the film.
[Elder/VA]: What was that?
You: That you can determine your own future. You just have to make the choice.
[Elder/VA]: Advice to live by.**

Situation #1e: **You want to talk about the weather forecast on the weekend.**

Please use this format for the dialogue:

**You:
[Elder/VA]:**

The script can be as long or as short as you'd like.

Situation #2e: **You heard some interesting news today that you'd like to discuss.**Choose any news item you'd like, real or imagined. For example, the latest news on COVID-19, sports, or politics. Please use this format for the dialogue:

**You:
[Elder/VA]:**

The script can be as long or as short as you'd like.

Situation #3e: **You have a difficult situation with a friend or coworker, and you'd like some advice about it.** Choose any difficult situation that comes to mind, real or imagined. Please use this format for the dialogue:

**You:
[Elder/VA]:**

The script can be as long or as short as you'd like.

## Part 2: Imagine Ideal Activities

Please suggest **activities** that you think may be perfect with [an ideal VA/an elder you trust]. They do not have to be conversational activities.

# Elicitation Instrument: Japanese・日本語

## 第一部：理想的な会話内容の想像

以下の**2**つの状況について、あなたと[理想的な音声アシスタント(以下**VA**) /あなたか信頼する高齢者]との間て、理想的な体験や結果たと思う会話を想像し、その会話内容を書いてぐだたさい。

例) 場面:あなたは今日素晴らしい映画を鑑賞し、それについて話し合いたいと思っています。

あなた:ちょうど「ターミネーター」を見て帰ってきたんですよ。
[VA/高齢者]:いいですね、どうでしたか?
あなた:そうですね。素晴らしかったですよ。特殊効果が気に入りました。
[VA/高齢者]:どんな特殊効果なの?
あなた:そうですね。本物の俳優のフィルムに3Dモデルを合成して使っていました。ほとんど違和感を感じませんでした。
[VA/高齢者]:そうですか、それは見てみたいです。3Dがまだ新しかった頃は、本当に偽物だと分かりやすいものでした。
あなた:随分と進歩したものですね。この映画のメッセージ性も良かったですね。
[VA/高齢者]:そうなんですか。何だったんですか?
あなた:自分の未来は自分で決められるということです。自分で選択すればいいのです。
[VA/高齢者]:そうですね。生きるためのアドバイスですね。

**場面例 1:**週末の天気予報について聞きたい。

以下の形式で会話内容を記述してください。

あなた:
[VA/高齢者]:

記述する会話内容の長さは自由です。

**場面例 2:**今日聞いた面白いニュースについて議論したい。

議論する具体的なニュースは想像しやすいものを自由に選んで記述してください。 例:COVID-19やスポーツ、政治に関する最近のニュースなど。

以下の形式で会話内容を記述してください。

あなた:
[VA/高齢者]:

記述する会話内容の長さは自由です。

**場面例 3:**
あなたは友達や同僚との間で問題が起こっており、それについてアドバイスをもらいたい。

起きている具体的な問題は想像しやすいものを自由に選んで記述してください。以下の形式で会話内容を記 述してください。

あなた:
[VA/高齢者]:

記述する会話内容の長さは自由です。

## 第二部：理想的な活動の想像

[理想的なVA/あなだか信頼する高齢者]と一緒に行いたい、または理想とする活動について教えてぐたさい。 会話に限定した活動である必要はありません。
